# Supplementary material
Source: PubMed Central journal article supplement (PMC5324826)
Supplement: NIHMS848720-supplement-Supp.pdf [file NIHMS848720-supplement-Supp.pdf]

**Table S1. Molecular Modeling Results for Novel Variants Identified in Cameroonian Families\***

| Protein | Variant      | Domain                                     | Template                                               | PDB # | Ref. | Predicted Effect on Protein                                                                                                                                                                  |
|---------|--------------|--------------------------------------------|--------------------------------------------------------|-------|------|----------------------------------------------------------------------------------------------------------------------------------------------------------------------------------------------|
| MYO7A   | p.Leu1935del | $\alpha$ A helix of<br>F1 lobe of<br>FERM2 | MYO7A MyTH4-<br>FERM1-SH3 in complex<br>with SANS CEN1 | 3PVL  | [8]  | Disrupts folding of FERM2 domain, which is predicted to result in poor contact of F1 lobe residues with the CEN1/central domain of SANS protein                                              |
| CDH23   | p.Asp2133Glu | EC20                                       | CDH23 EC2                                              | 2WD0  | [9]  | Loss of Ca <sup>++</sup> -binding site, which would likely affect tip link rigidity, unfolding and <i>trans</i> -EC binding                                                                  |
| CDH23   | p.Met2907Thr | EC27                                       | CDH8 EC3                                               | 2A62  | [10] | H-bond change is expected to result in structural changes in linker regions                                                                                                                  |
| LOXHD1  | p.Arg1124His | $\beta$ 8 strand of<br>PLAT 8              | 11R-lipoxygenase                                       | 3VF1  | [11] | Longer $\beta$ 9 strand and malpositioned residues in the linker region between strands $\beta$ 8- $\beta$ 9, limiting access to $\beta$ 8 strand residues that might be involved in binding |
| LOXHD1  | p.Phe1327Ile | $\beta$ 2 strand of<br>PLAT 10             | 11R-lipoxygenase                                       | 3VF1  | [11] | Might affect gating of the $\beta$ -sandwich or binding of other proteins                                                                                                                    |

PDB, RCSB Protein Data Bank; Ref, reference number; CDH, cadherin; EC, extracellular domain.

\* For the five novel variants identified in Cameroonian families, molecular modeling was performed using SWISS-MODEL [6] and Phyre2 [7].

6. Biasini M, Bienert S, Waterhouse A, et al. SWISS-MODEL: modelling protein tertiary and quaternary structure using evolutionary information. *Nucleic Acids Res* 2014 ;42:W252-8.
7. Kelley LA et al. The Phyre2 web portal for protein modeling, prediction and analysis. *Nature Protocols* 2015;10: 845-858.
8. Wu L, Pan L, Wei Z, Zhang M. Structure of MyTH4-FERM domains in myosin VIIa tail bound to cargo. *Science* 2011;331:757-60.
9. Sotomayor M, Weihofen WA, Gaudet R, Corey DP. Structural determinants of cadherin-23 function in hearing and deafness. *Neuron* 2010;66:85-100.
10. Patel SD, Ciatto C, Chen CP, et al. Type II cadherin ectodomain structures: implications for classical cadherin specificity. *Cell* 2006;124:1255-68.
11. Eek P, Järving R, Järving I, Gilbert NC, Newcomer ME, Samel N. Structure of a calcium-dependent 11R-lipoxygenase suggests a mechanism for Ca<sup>2+</sup> regulation. *J Biol Chem* 2012; 287:22377-86.

Table S2: Description of Study Subjects

| Characteristics    | Categories                           | <i>n</i> (%)          |
|--------------------|--------------------------------------|-----------------------|
| Sex                | Male                                 | 14 (53.8)             |
|                    | Female                               | 12 (46.2%)            |
| Genetics           | Autosomal Recessive                  | 10 <sup>1</sup> (100) |
|                    | Nonsyndromic                         | 26 (100)              |
|                    | <i>GJB2</i> -, <i>GJB6</i> -negative | 26 (100)              |
| Age of Onset of    | Congenital / Prelingual              | 26 (100)              |
| Hearing Impairment | Profound I (91-100dB)                | 12 (46.2)             |
|                    | Profound II (101-110dB)              | 11 (42.3)             |
|                    | Profound III (111-119dB)             | 3 (11.5)              |
| Type of Hearing    | Bilateral Symmetric                  | 26 (100)              |
| Impairment         | Sensorineural                        | 26 (100)              |
|                    | Flat                                 | 9 (34.6)              |
| Audiogram Shape    | Sloping                              | 17 (65.4%)            |

<sup>1</sup> Number of families

Supplementary Table S3: Genes included on the targeted genomic enrichment panel used in this study

| Gene Name          | Gene Name                                             |               | Location     | REFSEQ IDs       | Inheritance |
|--------------------|-------------------------------------------------------|---------------|--------------|------------------|-------------|
| <b>ACTG1</b>       | actin, gamma 1                                        | DFNA20/26     | 17q25        | NM_001614        | dominant    |
| <b>ADGRV1</b>      | G protein-coupled receptor v1                         | USH2C         | 5q14.3       | NM_032119        | recessive   |
| <b>CCDC50</b>      | coiled-coil domain containing 50                      | DFNA44        | 3q28-q29     | NM_178335        | dominant    |
| <b>CDH23</b>       | cadherin-related 23                                   | DFNB12, USH1D | 10q21-q22    | NM_022124        | recessive   |
| <b>CLDN14</b>      | claudin 14                                            | DFNB29        | 21q22        | NM_012130        | recessive   |
| <b>CLRN1</b>       | clarin 1                                              | USH3          | 3q25.1       | NM_174878        | recessive   |
| <b>COCH</b>        | coagulation factor C homolog, cochlin                 | DFNA9         | 14q12-q13    | NM_004086        | dominant    |
| <b>COL11A2</b>     | collagen, type XI, alpha 2                            | DFNB53/DFNA13 | 6p21.3       | NM_080680        | both        |
| <b>CRYM</b>        | crystallin, mu                                        | ...           | 16p12.2      | NM_001888        | dominant    |
| <b>DFNA5</b>       | deafness, autosomal dominant 5                        | DFNA5         | 7p15         | NM_004403        | dominant    |
| <b>DFNB31/WHRN</b> | whirlin/autosomal recessive deafness type 31 protein  | USH2D         | 9q32         | NM_015404        | recessive   |
| <b>DFNB59/PJVK</b> | pejvakin/autosomal recessive deafness type 59 protein |               | 2q31.2       | NM_00104270<br>2 | recessive   |
| <b>DIAPH1</b>      | diaphanous homolog 1                                  | DFNA1         | 5q31         | NM_005219        | dominant    |
| <b>DSPP</b>        | dentin sialophosphoprotein                            | DFNA39        | 4q21.3       | NM_014208        | dominant    |
| <b>ESPN</b>        | espin                                                 | DFNB36        | 1p36.3       | NM_031475        | recessive   |
| <b>ESRRB</b>       | estrogen-related receptor beta                        | DFNB35        | 14q24.1-24.3 | NM_004452        | recessive   |
| <b>EYA4</b>        | eyes absent homolog 4                                 | DFNA10        | 6q22-q23     | NM_004100        | dominant    |
| <b>GIPC3</b>       | GAIP C-terminus interacting protein 3                 | DFNB15/DFNB95 | 19p13.3      | NM_133261        | recessive   |
| <b>GJB2</b>        | gap junction protein, beta 2                          | DFNB1/DFNA3   | 13q12        | NM_004004        | both        |
| <b>GJB3</b>        | gap junction protein, beta 3                          | DFNA2         | 1p34         | NM_024009        | both        |
| <b>GJB6</b>        | gap junction protein, beta 6                          | DFNB1/DFNA3   | 13q12        | NM_006783        | both        |
| <b>GPSM2</b>       | g-protein signalling modulator 2                      | DFNB82        | 1p13.3-22.1  | NM_013296        | recessive   |
| <b>GRHL2</b>       | grainyhead-like 2                                     | DFNA28        | 8q22         | NM_024915        | recessive   |
| <b>GRXCR1</b>      | glutaredoxin cysteine-rich 1                          | DFNB25        | 4p13         | NM_00108047<br>6 | recessive   |
| <b>HGF</b>         | hepatocyte growth factor                              | DFNB39        | 7q21.1       | NM_000601        | recessive   |

|                 |                                                               |                |              |              |                    |
|-----------------|---------------------------------------------------------------|----------------|--------------|--------------|--------------------|
| <b>ILDR1</b>    | immunoglobulin-like domain containing receptor 1              | DFNB42         | 3q21.1       | NM_175924    | recessive          |
| <b>KCNQ4</b>    | potassium voltage-gated channel, KQT-like subfamily, member 4 | DFNA2          | 1p34         | NM_004700    | dominant           |
| <b>LHFPL5</b>   | lipoma HMGIC fusion partner-like 5                            | DFNB66/67      | 6p21.2-p22.3 | NM_182548    | recessive          |
| <b>LOXHD1</b>   | lipoygenase homology domains 1                                | DFNB77         | 18q21.1      | NM_144612    | recessive          |
| <b>LRTOMT</b>   | leucine rich transmembrane and O-methyltransferase            | DFNB63         | 11q13.4      | NM_145309    | recessive          |
| <b>MARVELD2</b> | MARVEL domain containing 2                                    | DFNB49         | 5q12.3-q14.1 | NM_001038603 | recessive          |
| <b>miR-96</b>   | microRNA 96                                                   | DFNA50         | 7q32.2       | NR_029512    | microRNA           |
| <b>miR-182</b>  | microRNA 182                                                  | ...            | 7q32.2       | NR_029614    | microRNA           |
| <b>miR-183</b>  | microRNA 183                                                  | ...            | 7q32.2       | NR_029615    |                    |
| <b>MTRNR1</b>   | mitochondrially encoded 12S RNA                               | ...            | chrM         |              |                    |
| <b>MTTS1</b>    | mitochondrially encoded tRNA serine 1                         | ...            | chrM         |              |                    |
| <b>MYH14</b>    | myosin, heavy chain 14, non-muscle                            | DFNA4          | 19q13.33     | NM_024729    | dominant           |
| <b>MYH9</b>     | myosin, heavy chain 9, non-muscle                             | DFNA17         | 22q13.1      | NM_002473    | dominant           |
| <b>MYO15A</b>   | myosin XVA                                                    | DFNB3          | 17p11.2      | NM_016239    | recessive          |
| <b>MYO1A</b>    | myosin IA                                                     | DFNA48         | 12q13-q15    | NM_005379    | dominant           |
| <b>MYO3A</b>    | myosin IIIA                                                   | DFNB30         | 10p11.1      | NM_017433    | recessive          |
| <b>MYO6</b>     | myosin VI                                                     | DFNA22, DFNB37 | 6q14.1       | NM_004999    | both               |
| <b>MYO7A</b>    | myosin VIIA                                                   | DFNA11, DFNB2  | 11q13.5      | NM_000260    | both               |
| <b>OTOA</b>     | otoancorin                                                    | DFNB22         | 16p12.2      | NM_144672    | recessive          |
| <b>OTOF</b>     | otoferlin                                                     | DFNB6/9        | 2p23.1       | NM_194248    | recessive          |
| <b>PCDH15</b>   | protocadherin-related 15                                      | DFNB12, USH1F  | 10q21.1      | NM_033056    | recessive          |
| <b>POU3F4</b>   | POU class 3 homeobox 4                                        | DFN3           | Xq21.1       | NM_000307    | x-linked recessive |
| <b>POU4F3</b>   | POU class 4 homeobox 3                                        | DFNA15         | 5q31         | NM_002700    | dominant           |
| <b>PRPS1</b>    | phosphoribosylpyrophosphate synthetase 1                      | DFN2           | Xq22         | NM_002764    | recessive          |

|                |                                               |                     |             |              |           |
|----------------|-----------------------------------------------|---------------------|-------------|--------------|-----------|
| <b>PTPRQ</b>   | protein-tyrosine phosphatase receptor, type Q | DFNB84              | 12q21.2     | NM_001145026 | recessive |
| <b>RDX</b>     | radixin                                       | DFNB24              | 11q23       | NM_002906    | recessive |
| <b>SLC17A8</b> | solute carrier family 17, member 3            | DFNA25              | 12q21-24    | NM_01098486  | recessive |
| <b>SLC26A4</b> | solute carrier family 26, member 4            | DFNB4               | 7q31        | NM_000441    | recessive |
| <b>SLC26A5</b> | solute carrier family 26, member 4            | ...                 | 7q22.1      | NM_198999    | recessive |
| <b>STRC</b>    | stereocilin                                   | DFNB16              | 15q21-q22   | NM_153700    | recessive |
| <b>TECTA</b>   | tectorin alpha                                | DFNB21/DFNA8/DFNA12 | 11q         | NM_005422    | both      |
| <b>TJP2</b>    | tight junction protein 2                      | DFNA51              | 9q21        | NM_001170416 | recessive |
| <b>TMC1</b>    | transmembrane channel-like 1                  | DFNB7/DFNB11/DFNA36 | 9q13-q21    | NM_138691    | both      |
| <b>TMIE</b>    | transmembrane inner ear                       | DFNB6               | 3p14-p21    | NM_147196    | recessive |
| <b>TMPRSS3</b> | transmembrane protease, serine 3              | DFNB8/DFNB10        | 21q22       | NM_024022    | recessive |
| <b>TPRN</b>    | taperin                                       | DFNB79              | 9q34.3      | NM_001128228 | recessive |
| <b>TRIOBP</b>  | TRIO and F-actin binding protein              | DFNB28              | 22q13       | NM_001039141 | recessive |
| <b>USH1C</b>   | Usher syndrome 1C homolog                     | DFNB18/USH1C        | 11p14-p15.1 | NM_153676    | recessive |
| <b>USH1G</b>   | Usher syndrome 1G                             | USH1G               | 17q25.1     | NM_173477    | recessive |
| <b>USH2A</b>   | Usher syndrome 2A                             | USH2A               | 1q41        | NM_206933    | recessive |
| <b>WFS1</b>    | Wolfram syndrome 1 (wolframin)                | DFNA6/DFNA14        | 4p16.3      | NM_006005    | dominant  |

1  
2  
3  
4  
5  
6  
7  
8  
9  
10  
11  
12  
13  
14  
15  
16  
17  
18  
19  
20  
21  
22  
23  
24  
25  
26  
27  
28  
29  
30  
31  
32  
33  
34  
35  
36  
37  
38  
39  
40  
41  
42  
43  
44  
45  
46  
47  
48  
49  
50  
51  
52  
53  
54  
55  
56  
57  
58  
59  
60

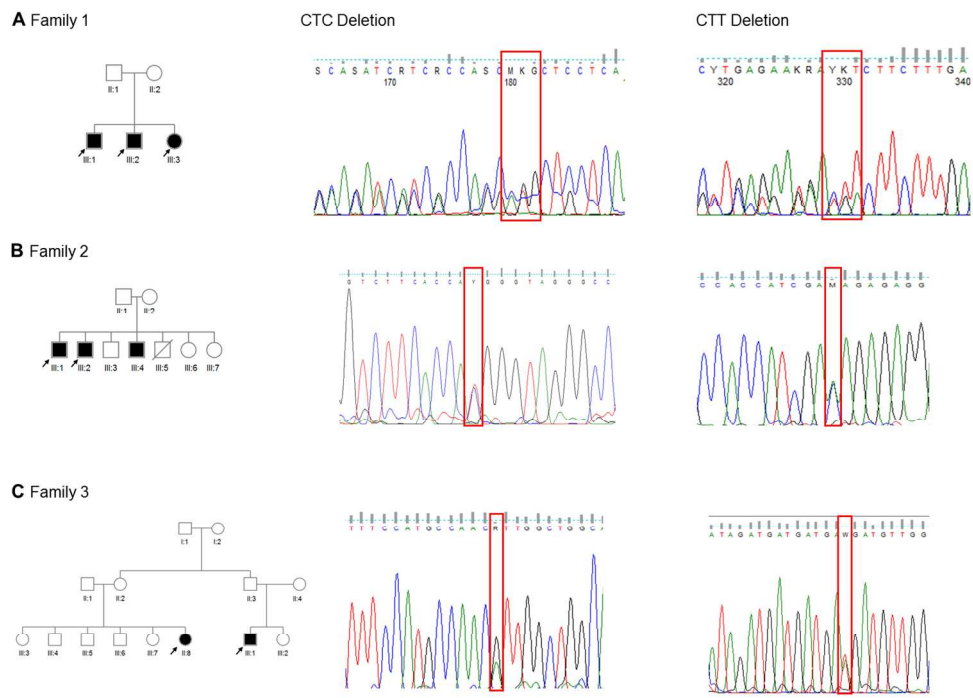

Fig. S1

361x270mm (120 x 120 DPI)

View Only

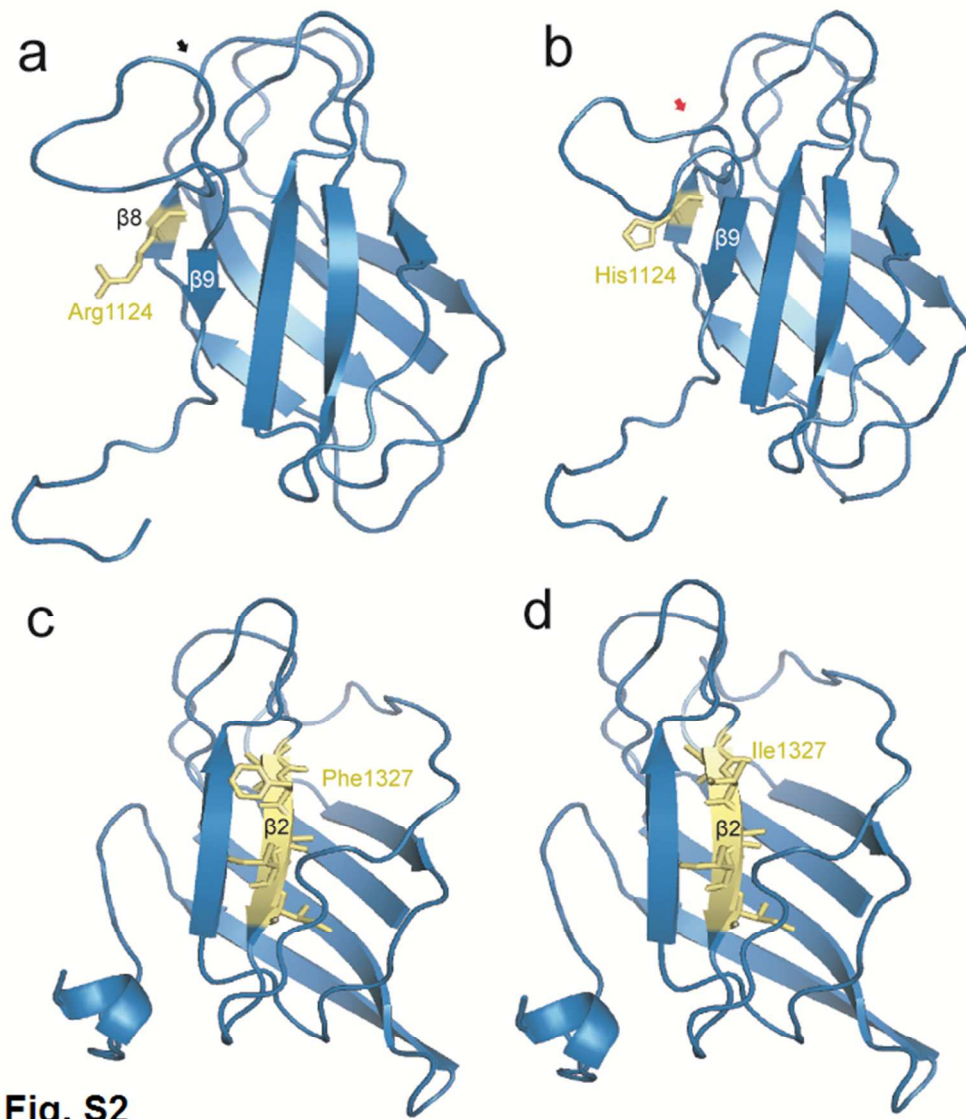**Fig. S2**

61x71mm (300 x 300 DPI)
